# Supplementary material for: Detection of procalcitonin (PCT) using the double antibody sandwich method based on fluorescence resonance energy transfer between upconversion nanoparticles and quantum dots
Source: Royal Society of Chemistry journal article supplement (doi:10.1039/c8ay00039e), 2018-01-01
Supplement: c8ay00039e1.pdf [file c8ay00039e1.pdf]

## **Supporting Information**

### **Detection of procalcitonin (PCT) using the double antibody sandwich method based on fluorescence resonant energy transfer between upconversion nanoparticles and quantum dots**

Yang Zhou, Xiangming Shao, Yuwang Han,\* Hongman Zhang\*

College of Chemistry and Molecular Engineering, Nanjing Tech University, Nanjing, Jiangsu, 211800, P. R. China.

Corresponding author:

Yuwang Han: e-mail, hanyw@njtech.edu.cn, Hongman Zhang: e-mail, hmzhang@njtech.edu.cn.

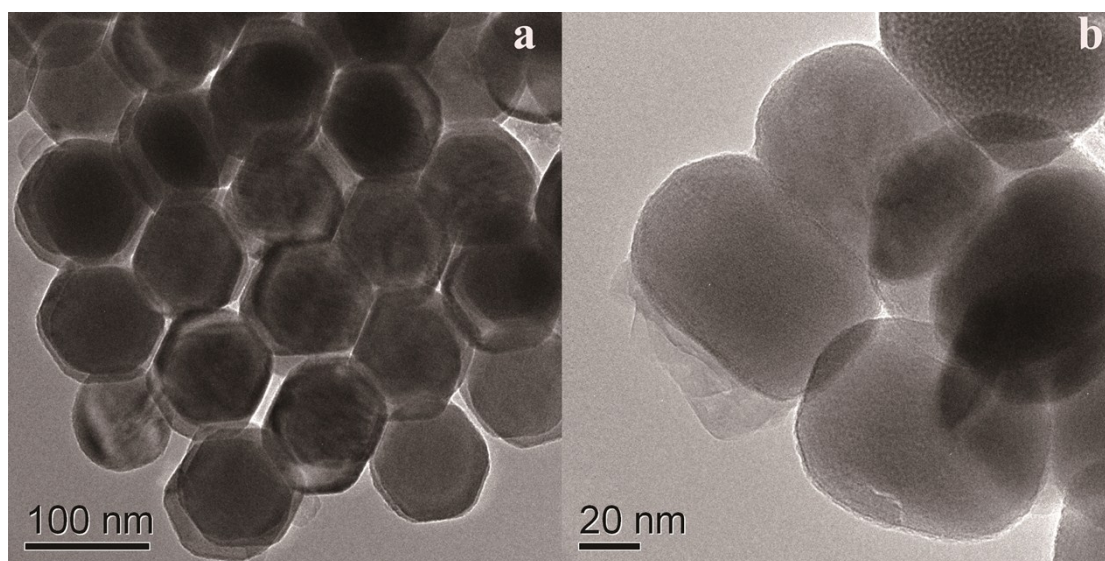

**Figure S1** TEM images of NaYF<sub>4</sub>:Yb, Er (a) before and (b) after hydrophilic functionalization.

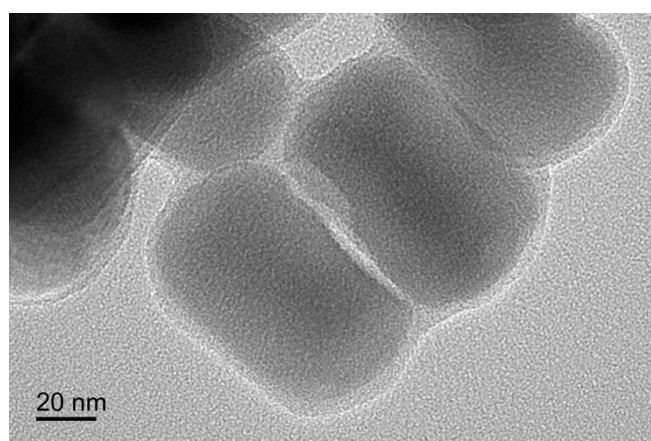

**Figure S2** TEM image of protein on the NaYF<sub>4</sub>:Yb, Er after protein conjugation.

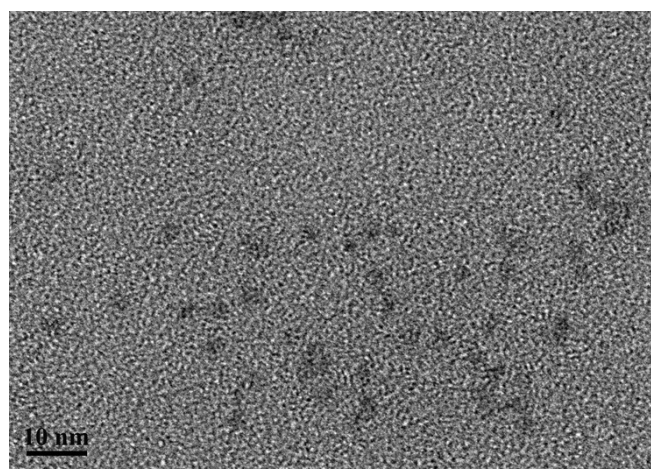

**Figure S3** TEM image of CdTe QDs with MPA modification.

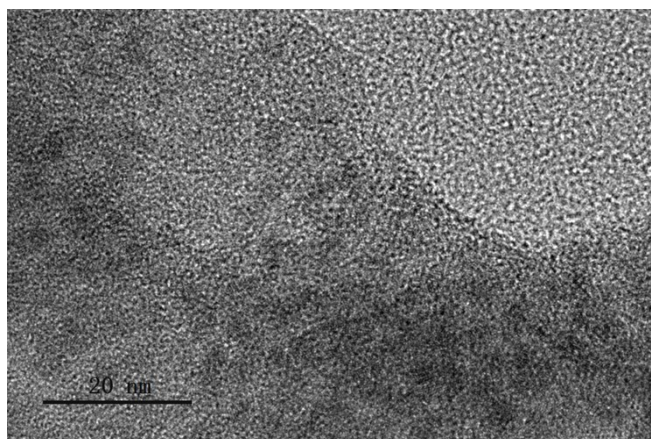

**Figure S4** TEM image of QDs conjugated with antibody.

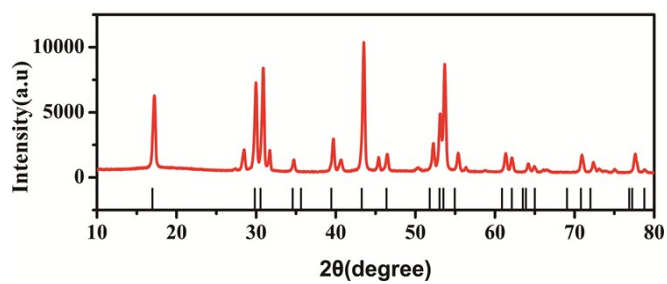

**Figure S5** XRD pattern of NaYF<sub>4</sub>:Yb, Er before PAA modification.

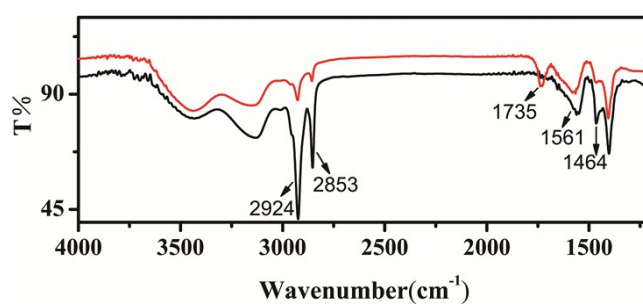

**Figure S6** Infrared spectra of NaYF<sub>4</sub>:Yb<sup>3+</sup>, Er<sup>3+</sup> before (black line) and after (red line) PAA modification.

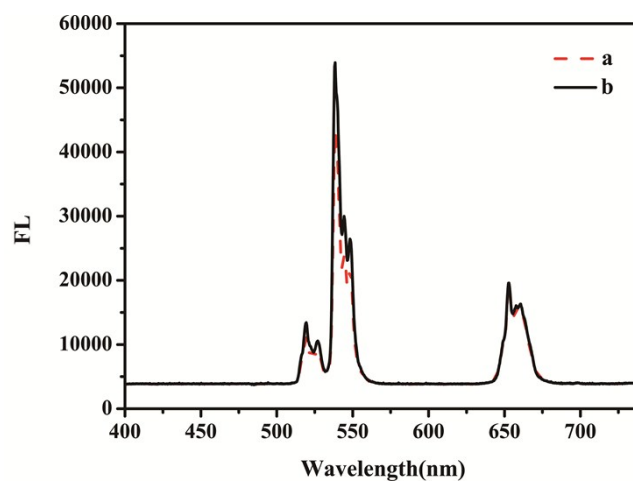

**Figure S7** Room-temperature fluorescence spectra of 5.0 mg/mL NaYF<sub>4</sub>: Yb, Er nanoparticles in cyclohexane (b) and after PAA modification in water (a) with a 980-nm laser.

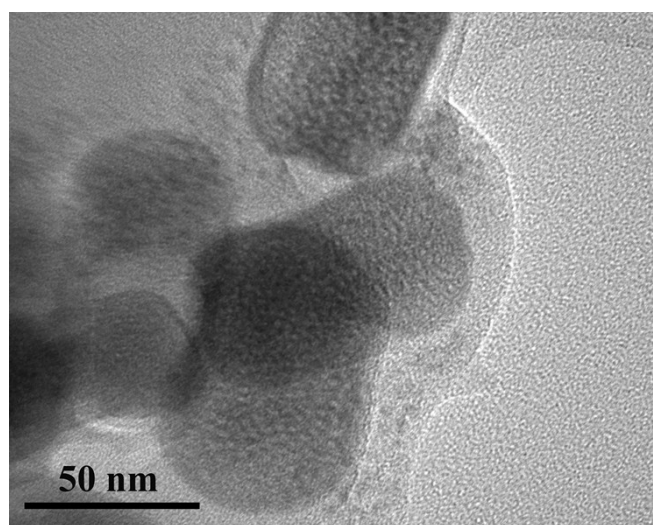

**Figure S8** The TEM photo of the FRET system between NaYF<sub>4</sub> (Yb, Er) upconversion nanoparticles (UCNPs) and CdTe quantum dots (QDs).

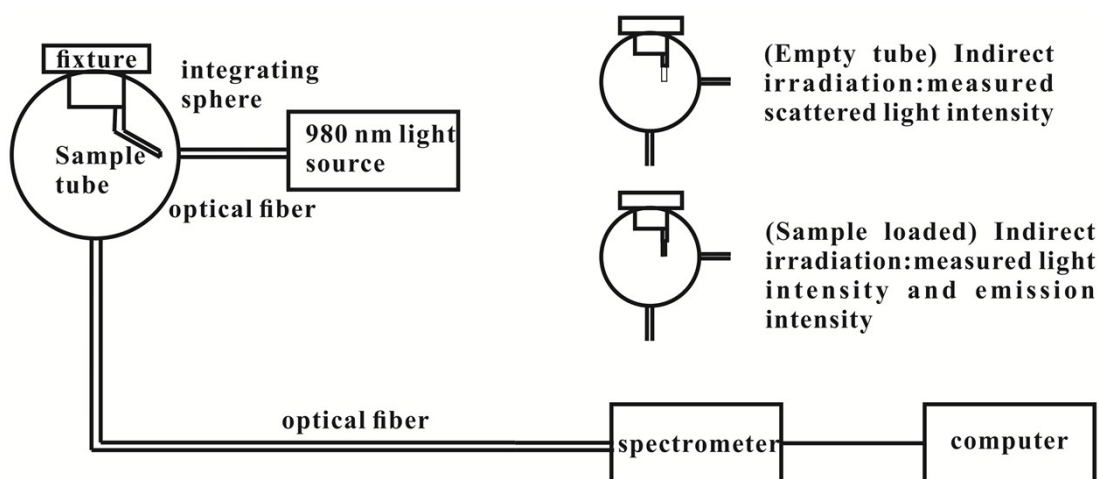

**Figure S9** Schematic representation of the system for UCNPs quantum yield determination.

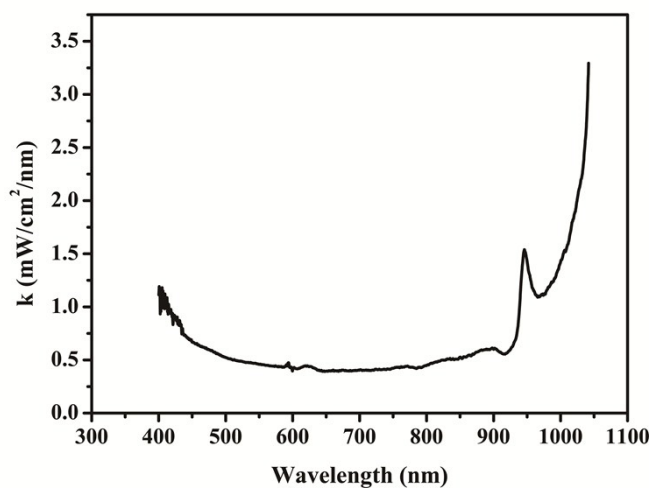

**Figure S10** Response curve of the fluorescence spectrometer using a standard light source (iD2000 Deuterium halogen combo light source).

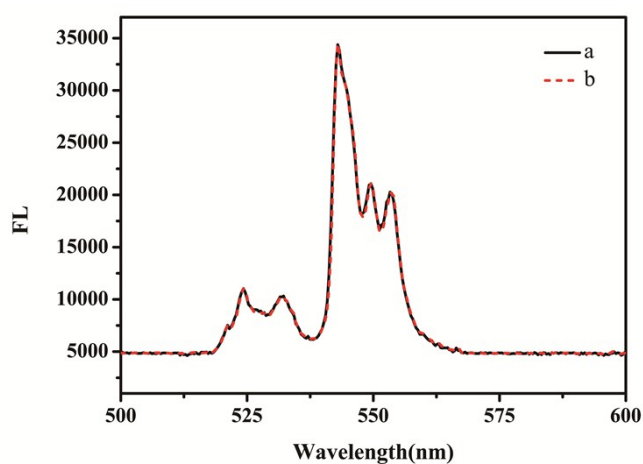

**Figure S11** Fluorescence spectra of PAA (40μL, 5.0 mg/mL) functionalized NaYF<sub>4</sub>: Yb, Er nanoparticles at 37 °C before (a) and after one hour (b) in serum samples (160μL of 0.02ng/mL negative sample) with a 980nm laser.

### 1. Calculation of the Förster distance $R_0$ :

The Förster distance was defined by Eq. (3):

$$R_0 = 0.02108(\kappa^2 \phi n^4 J)^{1/6} \text{ nm} \quad \text{Eq. (3)}$$

where  $\phi$  is the quantum yield of the donor,  $\kappa^2 = 0.67$  (dynamic averaging) is the dipole orientation factor,  $n = 1.35$  is the refractive index of the medium, and  $J$  (in  $\text{M}^{-1} \text{cm}^{-1} \text{nm}^4$ ) defines the spectral overlap between donor ( $\text{Er}^{3+}$  in the UCNPs) PL and acceptor (QD) absorption as a function in Eq. (4). According to the literature,<sup>1</sup> the calculation of  $J$  was  $6.04 \times 10^{16} \text{ nm}^4 \text{M}^{-1} \text{cm}^{-1}$ .

$$J = \int_{500 \text{ nm}}^{575 \text{ nm}} F(\text{Er}^{3+}) \varepsilon_{\text{QD}} \lambda^4 d\lambda \quad \text{Eq. (4)}$$

**References**

- 1 FRET – Förster Resonance Energy Transfer, ed. I. L. Medintz and N. Hildebrandt, WileyVCH, Weinheim, Germany, **2014**
